# Supplementary material for: Highly sensitive optical thermometers based on unconventional thermometric coupled levels of Tm3+ following a Boltzmann-type distribution in oxyfluoride glass ceramics
Source: Royal Society of Chemistry journal article supplement (doi:10.1039/c9nj03969d), 2019-01-01
Supplement: c9nj03969d1.pdf [file c9nj03969d1.pdf]

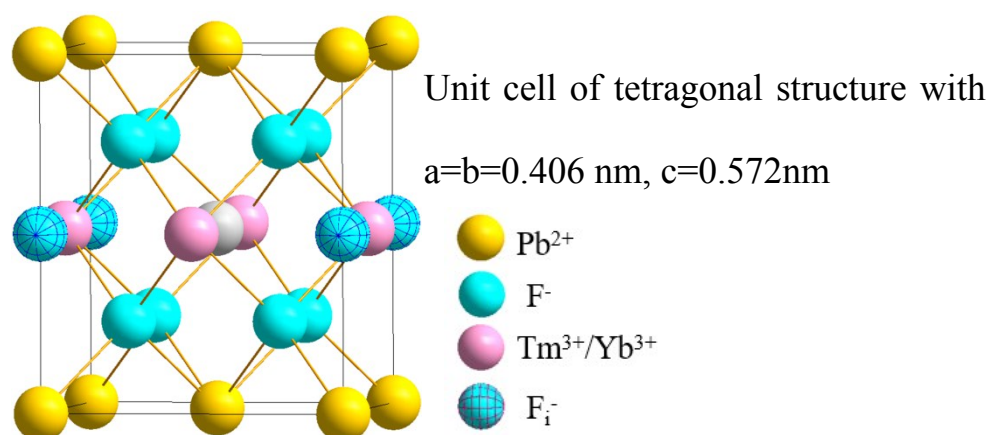

**Table 2** Atomic parameters of the tetragonal structure (space-group:  $P4/mmm$  (No. 123))

| Atom           | Ox. | Wyck. | Site symmetry | x/a | y/b | z/c |
|----------------|-----|-------|---------------|-----|-----|-----|
| Pb             | +2  | 1a    | 4/mmm         | 0   | 0   | 0   |
| Tm/Yb          | +3  | 1d    | 4/mmm         | 1/2 | 1/2 | 1/2 |
| F              | -1  | 4i    | 2/mm          | 0   | 1/2 | 1/4 |
| F interstitial | -1  | 1b    | 4/mm          | 0   | 0   | 1/2 |

data\_20597-ICSD

#?2008 by Fachinformationszentrum Karlsruhe, and the U.S. Secretary of  
#Commerce on behalf of the United States. All rights reserved.

\_database\_code\_ICSD 20597  
\_audit\_creation\_date 1980/01/01  
\_audit\_update\_record 2006/04/01  
\_chemical\_name\_systematic 'Lead Fluoride - Beta, Ht'  
\_chemical\_formula\_structural 'Pb F2'  
\_chemical\_formula\_sum 'F2 Pb1'  
\_publ\_section\_title

;

The neutron diffraction pattern investigation of cubic modificaton of  
Pb F2

;

loop\_  
\_citation\_id  
\_citation\_journal\_abbrev  
\_citation\_year  
\_citation\_journal\_volume  
\_citation\_page\_first  
\_citation\_page\_last  
\_citation\_journal\_id\_ASTM  
primary 'Doklady Akademii Nauk SSSR' 1961 138 110 111 DANKAS  
2 'Golden Book of Phase Transitions, Wroclaw' 2002 1 1 123 GBOPT5  
\_publ\_author\_name

;

Yamzin, I.I.;Nozik, Yu.Z.;Belov, N.V.

;

\_cell\_length\_a 5.940(1)  
\_cell\_length\_b 5.940(1)  
\_cell\_length\_c 5.940(1)  
\_cell\_angle\_alpha 90.  
\_cell\_angle\_beta 90.  
\_cell\_angle\_gamma 90.  
\_cell\_volume 209.58  
\_cell\_formula\_units\_Z 4  
\_symmetry\_space\_group\_name\_H-M 'F m -3 m'  
\_symmetry\_Int\_Tables\_number 225  
\_refine\_ls\_R\_factor\_all .203

loop\_  
\_symmetry\_equiv\_pos\_site\_id  
\_symmetry\_equiv\_pos\_as\_xyz  
1 'z, y, -x'  
2 'y, x, -z'

3 'x, z, -y'  
4 'z, x, -y'  
5 'y, z, -x'  
6 'x, y, -z'  
7 'z, -y, x'  
8 'y, -x, z'  
9 'x, -z, y'  
10 'z, -x, y'  
11 'y, -z, x'  
12 'x, -y, z'  
13 '-z, y, x'  
14 '-y, x, z'  
15 '-x, z, y'  
16 '-z, x, y'  
17 '-y, z, x'  
18 '-x, y, z'  
19 '-z, -y, -x'  
20 '-y, -x, -z'  
21 '-x, -z, -y'  
22 '-z, -x, -y'  
23 '-y, -z, -x'  
24 '-x, -y, -z'  
25 '-z, -y, x'  
26 '-y, -x, z'  
27 '-x, -z, y'  
28 '-z, -x, y'  
29 '-y, -z, x'  
30 '-x, -y, z'  
31 '-z, y, -x'  
32 '-y, x, -z'  
33 '-x, z, -y'  
34 '-z, x, -y'  
35 '-y, z, -x'  
36 '-x, y, -z'  
37 'z, -y, -x'  
38 'y, -x, -z'  
39 'x, -z, -y'  
40 'z, -x, -y'  
41 'y, -z, -x'  
42 'x, -y, -z'  
43 'z, y, x'  
44 'y, x, z'  
45 'x, z, y'  
46 'z, x, y'

47 'y, z, x'  
48 'x, y, z'  
49 'z, y+.5, -x+.5'  
50 'z+.5, y, -x+.5'  
51 'z+.5, y+.5, -x'  
52 'y, x+.5, -z+.5'  
53 'y+.5, x, -z+.5'  
54 'y+.5, x+.5, -z'  
55 'x, z+.5, -y+.5'  
56 'x+.5, z, -y+.5'  
57 'x+.5, z+.5, -y'  
58 'z, x+.5, -y+.5'  
59 'z+.5, x, -y+.5'  
60 'z+.5, x+.5, -y'  
61 'y, z+.5, -x+.5'  
62 'y+.5, z, -x+.5'  
63 'y+.5, z+.5, -x'  
64 'x, y+.5, -z+.5'  
65 'x+.5, y, -z+.5'  
66 'x+.5, y+.5, -z'  
67 'z, -y+.5, x+.5'  
68 'z+.5, -y, x+.5'  
69 'z+.5, -y+.5, x'  
70 'y, -x+.5, z+.5'  
71 'y+.5, -x, z+.5'  
72 'y+.5, -x+.5, z'  
73 'x, -z+.5, y+.5'  
74 'x+.5, -z, y+.5'  
75 'x+.5, -z+.5, y'  
76 'z, -x+.5, y+.5'  
77 'z+.5, -x, y+.5'  
78 'z+.5, -x+.5, y'  
79 'y, -z+.5, x+.5'  
80 'y+.5, -z, x+.5'  
81 'y+.5, -z+.5, x'  
82 'x, -y+.5, z+.5'  
83 'x+.5, -y, z+.5'  
84 'x+.5, -y+.5, z'  
85 '-z, y+.5, x+.5'  
86 '-z+.5, y, x+.5'  
87 '-z+.5, y+.5, x'  
88 '-y, x+.5, z+.5'  
89 '-y+.5, x, z+.5'  
90 '-y+.5, x+.5, z'

91  $'-x, z+.5, y+.5'$   
92  $'-x+.5, z, y+.5'$   
93  $'-x+.5, z+.5, y'$   
94  $'-z, x+.5, y+.5'$   
95  $'-z+.5, x, y+.5'$   
96  $'-z+.5, x+.5, y'$   
97  $'-y, z+.5, x+.5'$   
98  $'-y+.5, z, x+.5'$   
99  $'-y+.5, z+.5, x'$   
100  $'-x, y+.5, z+.5'$   
101  $'-x+.5, y, z+.5'$   
102  $'-x+.5, y+.5, z'$   
103  $'-z, -y+.5, -x+.5'$   
104  $'-z+.5, -y, -x+.5'$   
105  $'-z+.5, -y+.5, -x'$   
106  $'-y, -x+.5, -z+.5'$   
107  $'-y+.5, -x, -z+.5'$   
108  $'-y+.5, -x+.5, -z'$   
109  $'-x, -z+.5, -y+.5'$   
110  $'-x+.5, -z, -y+.5'$   
111  $'-x+.5, -z+.5, -y'$   
112  $'-z, -x+.5, -y+.5'$   
113  $'-z+.5, -x, -y+.5'$   
114  $'-z+.5, -x+.5, -y'$   
115  $'-y, -z+.5, -x+.5'$   
116  $'-y+.5, -z, -x+.5'$   
117  $'-y+.5, -z+.5, -x'$   
118  $'-x, -y+.5, -z+.5'$   
119  $'-x+.5, -y, -z+.5'$   
120  $'-x+.5, -y+.5, -z'$   
121  $'-z, -y+.5, x+.5'$   
122  $'-z+.5, -y, x+.5'$   
123  $'-z+.5, -y+.5, x'$   
124  $'-y, -x+.5, z+.5'$   
125  $'-y+.5, -x, z+.5'$   
126  $'-y+.5, -x+.5, z'$   
127  $'-x, -z+.5, y+.5'$   
128  $'-x+.5, -z, y+.5'$   
129  $'-x+.5, -z+.5, y'$   
130  $'-z, -x+.5, y+.5'$   
131  $'-z+.5, -x, y+.5'$   
132  $'-z+.5, -x+.5, y'$   
133  $'-y, -z+.5, x+.5'$   
134  $'-y+.5, -z, x+.5'$

135 '-y+.5, -z+.5, x'  
136 '-x, -y+.5, z+.5'  
137 '-x+.5, -y, z+.5'  
138 '-x+.5, -y+.5, z'  
139 '-z, y+.5, -x+.5'  
140 '-z+.5, y, -x+.5'  
141 '-z+.5, y+.5, -x'  
142 '-y, x+.5, -z+.5'  
143 '-y+.5, x, -z+.5'  
144 '-y+.5, x+.5, -z'  
145 '-x, z+.5, -y+.5'  
146 '-x+.5, z, -y+.5'  
147 '-x+.5, z+.5, -y'  
148 '-z, x+.5, -y+.5'  
149 '-z+.5, x, -y+.5'  
150 '-z+.5, x+.5, -y'  
151 '-y, z+.5, -x+.5'  
152 '-y+.5, z, -x+.5'  
153 '-y+.5, z+.5, -x'  
154 '-x, y+.5, -z+.5'  
155 '-x+.5, y, -z+.5'  
156 '-x+.5, y+.5, -z'  
157 'z, -y+.5, -x+.5'  
158 'z+.5, -y, -x+.5'  
159 'z+.5, -y+.5, -x'  
160 'y, -x+.5, -z+.5'  
161 'y+.5, -x, -z+.5'  
162 'y+.5, -x+.5, -z'  
163 'x, -z+.5, -y+.5'  
164 'x+.5, -z, -y+.5'  
165 'x+.5, -z+.5, -y'  
166 'z, -x+.5, -y+.5'  
167 'z+.5, -x, -y+.5'  
168 'z+.5, -x+.5, -y'  
169 'y, -z+.5, -x+.5'  
170 'y+.5, -z, -x+.5'  
171 'y+.5, -z+.5, -x'  
172 'x, -y+.5, -z+.5'  
173 'x+.5, -y, -z+.5'  
174 'x+.5, -y+.5, -z'  
175 'z, y+.5, x+.5'  
176 'z+.5, y, x+.5'  
177 'z+.5, y+.5, x'  
178 'y, x+.5, z+.5'

179 'y+.5, x, z+.5'  
180 'y+.5, x+.5, z'  
181 'x, z+.5, y+.5'  
182 'x+.5, z, y+.5'  
183 'x+.5, z+.5, y'  
184 'z, x+.5, y+.5'  
185 'z+.5, x, y+.5'  
186 'z+.5, x+.5, y'  
187 'y, z+.5, x+.5'  
188 'y+.5, z, x+.5'  
189 'y+.5, z+.5, x'  
190 'x, y+.5, z+.5'  
191 'x+.5, y, z+.5'  
192 'x+.5, y+.5, z'  
loop\_  
\_atom\_type\_symbol  
\_atom\_type\_oxidation\_number  
F1- -1  
Pb2+ 2  
loop\_  
\_atom\_site\_label  
\_atom\_site\_type\_symbol  
\_atom\_site\_symmetry\_multiplicity  
\_atom\_site\_Wyckoff\_symbol  
\_atom\_site\_fract\_x  
\_atom\_site\_fract\_y  
\_atom\_site\_fract\_z  
\_atom\_site\_occupancy  
\_atom\_site\_attached\_hydrogens  
Pb1 Pb2+ 4 a 0 0 0 1. 0  
F1 F1- 8 c 0.25 0.25 0.25 1. 0

#End of data\_20597-ICSD

\_ccdc\_publ\_extra\_info  
;

Reason for no structure factor data deposited:

ICSD #20597

CopyRight 2008 by Fachinformationszentrum Karlsruhe, and the U.S. Secretary of

Commerce on behalf of the United States. All rights reserved.

Coll Code 20597

;
